# Supplementary material
Source: publisher site journal article supplement (https://www.dovepress.com/article/620785)

Table S1. Stratified Analysis of Allergen Sensitization Differentiating Asthma from Allergic Rhinitis Across Age Groups

| Characteristic                   | <3   |             |         |                      | 3-6  |             |         |                      | 6-9  |             |         |                      | 9-12 |            |         |                      | ≥12   |              |         |                      |
|----------------------------------|------|-------------|---------|----------------------|------|-------------|---------|----------------------|------|-------------|---------|----------------------|------|------------|---------|----------------------|-------|--------------|---------|----------------------|
|                                  | OR   | 95% CI      | p-value | q-value <sup>£</sup> | OR   | 95% CI      | p-value | q-value <sup>£</sup> | OR   | 95% CI      | p-value | q-value <sup>£</sup> | OR   | 95% CI     | p-value | q-value <sup>£</sup> | OR    | 95% CI       | p-value | q-value <sup>£</sup> |
| Mugwort                          | 0.39 | 0.02, 10.03 | 0.511   | 0.988                | 1.62 | 0.71, 3.73  | 0.248   | 0.417                | 1.31 | 0.61, 2.62  | 0.462   | 0.792                | 1.18 | 0.33, 3.34 | 0.778   | 0.954                | NA    | NA           | NA      | NA                   |
| House Dust Mite Mix <sup>£</sup> | 0.92 | 0.41, 2.19  | 0.837   | 0.988                | 0.83 | 0.61, 1.13  | 0.246   | 0.417                | 0.99 | 0.68, 1.44  | 0.974   | 0.974                | 0.98 | 0.58, 1.70 | 0.954   | 0.954                | 0.94  | 0.43, 2.09   | 0.884   | 0.988                |
| Dog Dander                       | 0.70 | 0.24, 2.34  | 0.536   | 0.988                | 0.36 | 0.14, 0.81  | 0.019   | 0.299                | 1.84 | 0.91, 3.56  | 0.076   | 0.294                | 1.10 | 0.31, 3.11 | 0.864   | 0.954                | 1.23  | 0.18, 5.24   | 0.798   | 0.988                |
| <i>Humulus scandens</i>          | NA   | NA          | NA      | NA                   | 1.78 | 0.87, 3.69  | 0.115   | 0.417                | 1.01 | 0.55, 1.77  | 0.965   | 0.974                | 1.03 | 0.45, 2.15 | 0.946   | 0.954                | 1.52  | 0.47, 4.25   | 0.451   | 0.988                |
| Cat Dander                       | 0.52 | 0.20, 1.39  | 0.177   | 0.988                | 1.08 | 0.67, 1.73  | 0.748   | 0.839                | 1.37 | 0.87, 2.11  | 0.168   | 0.487                | 1.22 | 0.67, 2.16 | 0.509   | 0.954                | 0.96  | 0.38, 2.27   | 0.935   | 0.988                |
| Mold Mix <sup>°</sup>            | NA   | NA          | NA      | NA                   | 0.89 | 0.38, 2.00  | 0.788   | 0.839                | 1.66 | 0.73, 3.53  | 0.201   | 0.487                | 3.43 | 1.48, 7.65 | 0.003   | 0.071                | 0.97  | 0.05, 6.33   | 0.980   | 0.988                |
| Ragweed                          | NA   | NA          | NA      | NA                   | 2.15 | 0.93, 5.22  | 0.078   | 0.417                | 2.10 | 0.87, 4.84  | 0.086   | 0.294                | 2.05 | 0.43, 7.58 | 0.309   | 0.928                | 0.97  | 0.05, 6.33   | 0.980   | 0.988                |
| Tree Pollen Mix <sup>§</sup>     | NA   | 0.00, NA    | 0.988   | 0.988                | 0.73 | 0.41, 1.28  | 0.278   | 0.417                | 0.94 | 0.53, 1.59  | 0.823   | 0.974                | 1.79 | 0.79, 3.78 | 0.144   | 0.723                | 1.19  | 0.37, 3.25   | 0.748   | 0.988                |
| Cockroach                        | NA   | NA          | NA      | NA                   | 4.80 | 1.15, 32.37 | 0.051   | 0.412                | 4.11 | 1.34, 12.96 | 0.012   | 0.148                | 1.17 | 0.17, 4.81 | 0.844   | 0.954                | 16.11 | 1.98, 332.42 | 0.018   | 0.176                |
| Respiratory Allergen             | 0.63 | 0.33, 1.22  | 0.160   | 0.988                | 0.77 | 0.57, 1.04  | 0.094   | 0.417                | 0.92 | 0.63, 1.35  | 0.657   | 0.974                | 0.98 | 0.56, 1.75 | 0.937   | 0.954                | 0.95  | 0.42, 2.26   | 0.903   | 0.988                |
| Multiple Respiratory Allergies   | 0.89 | 0.28, 3.35  | 0.846   | 0.988                | 0.92 | 0.62, 1.36  | 0.674   | 0.809                | 1.30 | 0.87, 1.93  | 0.203   | 0.487                | 1.43 | 0.83, 2.46 | 0.193   | 0.723                | 0.96  | 0.40, 2.17   | 0.923   | 0.988                |
| Severe Respiratory Allergy       | 0.58 | 0.20, 1.77  | 0.312   | 0.988                | 0.98 | 0.71, 1.36  | 0.921   | 0.921                | 1.10 | 0.76, 1.60  | 0.605   | 0.969                | 1.03 | 0.60, 1.77 | 0.917   | 0.954                | 0.85  | 0.38, 1.87   | 0.681   | 0.988                |
| Sea Fish Mix <sup>¶</sup>        | 0.39 | 0.07, 2.13  | 0.252   | 0.988                | 1.83 | 0.76, 4.53  | 0.178   | 0.417                | 0.90 | 0.25, 2.53  | 0.856   | 0.974                | 0.46 | 0.02, 2.45 | 0.460   | 0.954                | 1.22  | 0.06, 8.65   | 0.859   | 0.988                |

| Characteristic                      | <3   |            |         |                      | 3-6  |            |         |                      | 6-9  |            |         |                      | 9-12 |             |         |                      | ≥12  |             |         |                      |
|-------------------------------------|------|------------|---------|----------------------|------|------------|---------|----------------------|------|------------|---------|----------------------|------|-------------|---------|----------------------|------|-------------|---------|----------------------|
|                                     | OR   | 95% CI     | p-value | q-value <sup>‡</sup> | OR   | 95% CI     | p-value | q-value <sup>‡</sup> | OR   | 95% CI     | p-value | q-value <sup>‡</sup> | OR   | 95% CI      | p-value | q-value <sup>‡</sup> | OR   | 95% CI      | p-value | q-value <sup>‡</sup> |
| Peanuts                             | 1.03 | 0.38, 3.30 | 0.953   | 0.988                | 2.03 | 1.10, 3.84 | 0.025   | 0.299                | 2.29 | 1.02, 4.96 | 0.038   | 0.180                | 0.66 | 0.04, 3.80  | 0.701   | 0.954                | 0.97 | 0.05, 6.33  | 0.980   | 0.988                |
| Soybeans                            | 0.87 | 0.30, 2.82 | 0.794   | 0.988                | 1.33 | 0.84, 2.10 | 0.223   | 0.417                | 2.07 | 1.04, 3.98 | 0.032   | 0.180                | 1.32 | 0.42, 3.46  | 0.598   | 0.954                | 0.59 | 0.03, 3.43  | 0.631   | 0.988                |
| Egg White                           | 1.01 | 0.59, 1.75 | 0.974   | 0.988                | 0.96 | 0.69, 1.33 | 0.804   | 0.839                | 2.16 | 1.39, 3.34 | <0.001  | 0.013                | 1.73 | 0.82, 3.48  | 0.134   | 0.723                | 3.40 | 1.07, 10.07 | 0.029   | 0.176                |
| Cow's Milk                          | 1.09 | 0.66, 1.82 | 0.733   | 0.988                | 1.21 | 0.87, 1.67 | 0.258   | 0.417                | 1.03 | 0.56, 1.81 | 0.911   | 0.974                | 1.18 | 0.38, 3.05  | 0.751   | 0.954                | 5.64 | 1.47, 21.69 | 0.010   | 0.176                |
| Beef                                | 1.07 | 0.57, 2.11 | 0.840   | 0.988                | 1.29 | 0.81, 2.04 | 0.275   | 0.417                | 1.54 | 0.62, 3.50 | 0.324   | 0.598                | 3.17 | 0.41, 19.53 | 0.211   | 0.723                | 1.64 | 0.08, 13.36 | 0.672   | 0.988                |
| Shrimp/Prawn                        | 0.39 | 0.05, 3.30 | 0.351   | 0.988                | 1.36 | 0.49, 3.73 | 0.547   | 0.730                | 0.84 | 0.19, 2.70 | 0.796   | 0.974                | 0.77 | 0.04, 4.63  | 0.813   | 0.954                | 1.64 | 0.08, 13.36 | 0.672   | 0.988                |
| Crab                                | 0.59 | 0.10, 4.53 | 0.566   | 0.988                | 1.67 | 0.68, 4.19 | 0.261   | 0.417                | 0.84 | 0.24, 2.34 | 0.764   | 0.974                | 1.17 | 0.17, 4.81  | 0.844   | 0.954                | 0.97 | 0.05, 6.33  | 0.980   | 0.988                |
| Lamb                                | 1.11 | 0.64, 1.99 | 0.715   | 0.988                | 0.84 | 0.59, 1.19 | 0.333   | 0.470                | 1.11 | 0.66, 1.79 | 0.691   | 0.974                | 1.73 | 0.79, 3.54  | 0.151   | 0.723                | 0.88 | 0.13, 3.50  | 0.869   | 0.988                |
| Gastrointestinal Allergen           | 1.04 | 0.63, 1.72 | 0.865   | 0.988                | 1.07 | 0.80, 1.45 | 0.642   | 0.809                | 1.52 | 1.04, 2.21 | 0.030   | 0.180                | 1.68 | 0.96, 2.91  | 0.065   | 0.723                | 1.03 | 0.40, 2.44  | 0.942   | 0.988                |
| Multiple Gastrointestinal Allergies | 1.40 | 0.83, 2.41 | 0.219   | 0.988                | 1.20 | 0.87, 1.66 | 0.261   | 0.417                | 1.31 | 0.80, 2.08 | 0.267   | 0.535                | 1.23 | 0.51, 2.70  | 0.622   | 0.954                | 3.40 | 1.07, 10.07 | 0.029   | 0.176                |
| Severe Gastrointestinal Allergy     | 1.28 | 0.52, 3.61 | 0.613   | 0.988                | 1.64 | 0.83, 3.28 | 0.156   | 0.417                | 1.65 | 0.70, 3.63 | 0.231   | 0.503                | 1.17 | 0.17, 4.81  | 0.844   | 0.954                | 2.54 | 0.34, 13.66 | 0.296   | 0.988                |

<sup>‡</sup>False discovery rate correction for multiple testing; <sup>§</sup>House Dust Mite Mix: *Dermatophagoides pteronyssinus* and *Dermatophagoides farinae*; <sup>∞</sup>Mold Mix: *Penicillium notatum*, *Alternaria alternata*, *Aspergillus fumigatus*, and *Cladosporium herbarum*; <sup>§</sup>Tree Pollen Mix: willow, poplar, and elm; <sup>¶</sup>Sea Fish Mix: cod, lobster, and scallop.

Abbreviations: CI = Confidence Interval; OR = Odds Ratio; NA: Not applicable (Odds ratios and 95% confidence intervals could not be reliably estimated due to zero cells or sparse data within specific strata).

**Figure S1. Age-stratified sensitization rates of specific inhalant and foodborne allergens.**

The panels exhibit prevalence dynamics allocated into four independent quadrants: (A) Inhalant allergens in patients with Allergic Rhinitis (AR); (B) Inhalant allergens in patients with Allergic Asthma (AS); (C) Foodborne allergens in patients with AR; and (D) Foodborne allergens in patients with AS. Bar charts present the prevalence of sensitization to individual allergens across predefined pediatric age groups (<3, 3-6, 6-9, 9-12, and  $\geq 12$  years). The statistical differences in sensitization rates across the five age groups were evaluated using the Chi-square test. *P*-values indicating statistically significant age-related variations are annotated accordingly, *ns*, *not significant*; \* *P* < 0.05; \*\* *P* < 0.01; \*\*\* *P* < 0.001.

Age Stratum <3 3-6 6-9 9-12 >=12

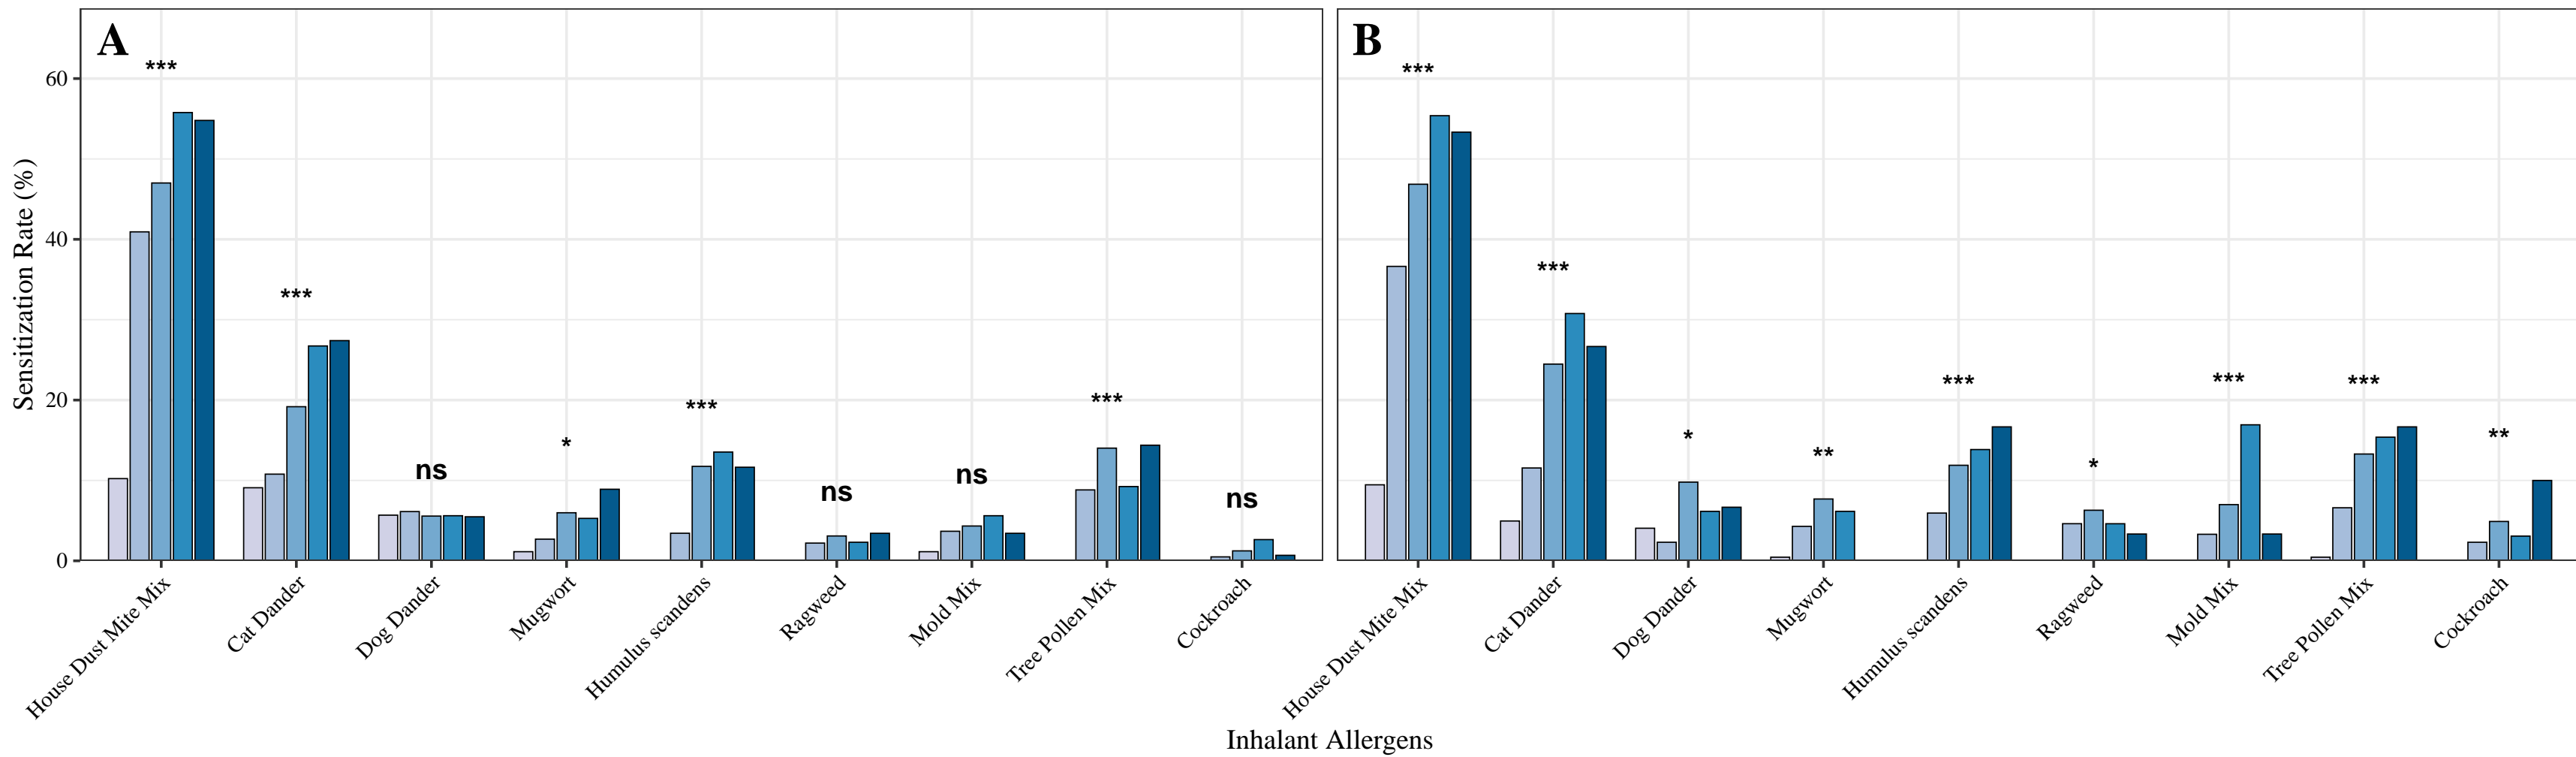

Age Stratum <3 3-6 6-9 9-12 >=12

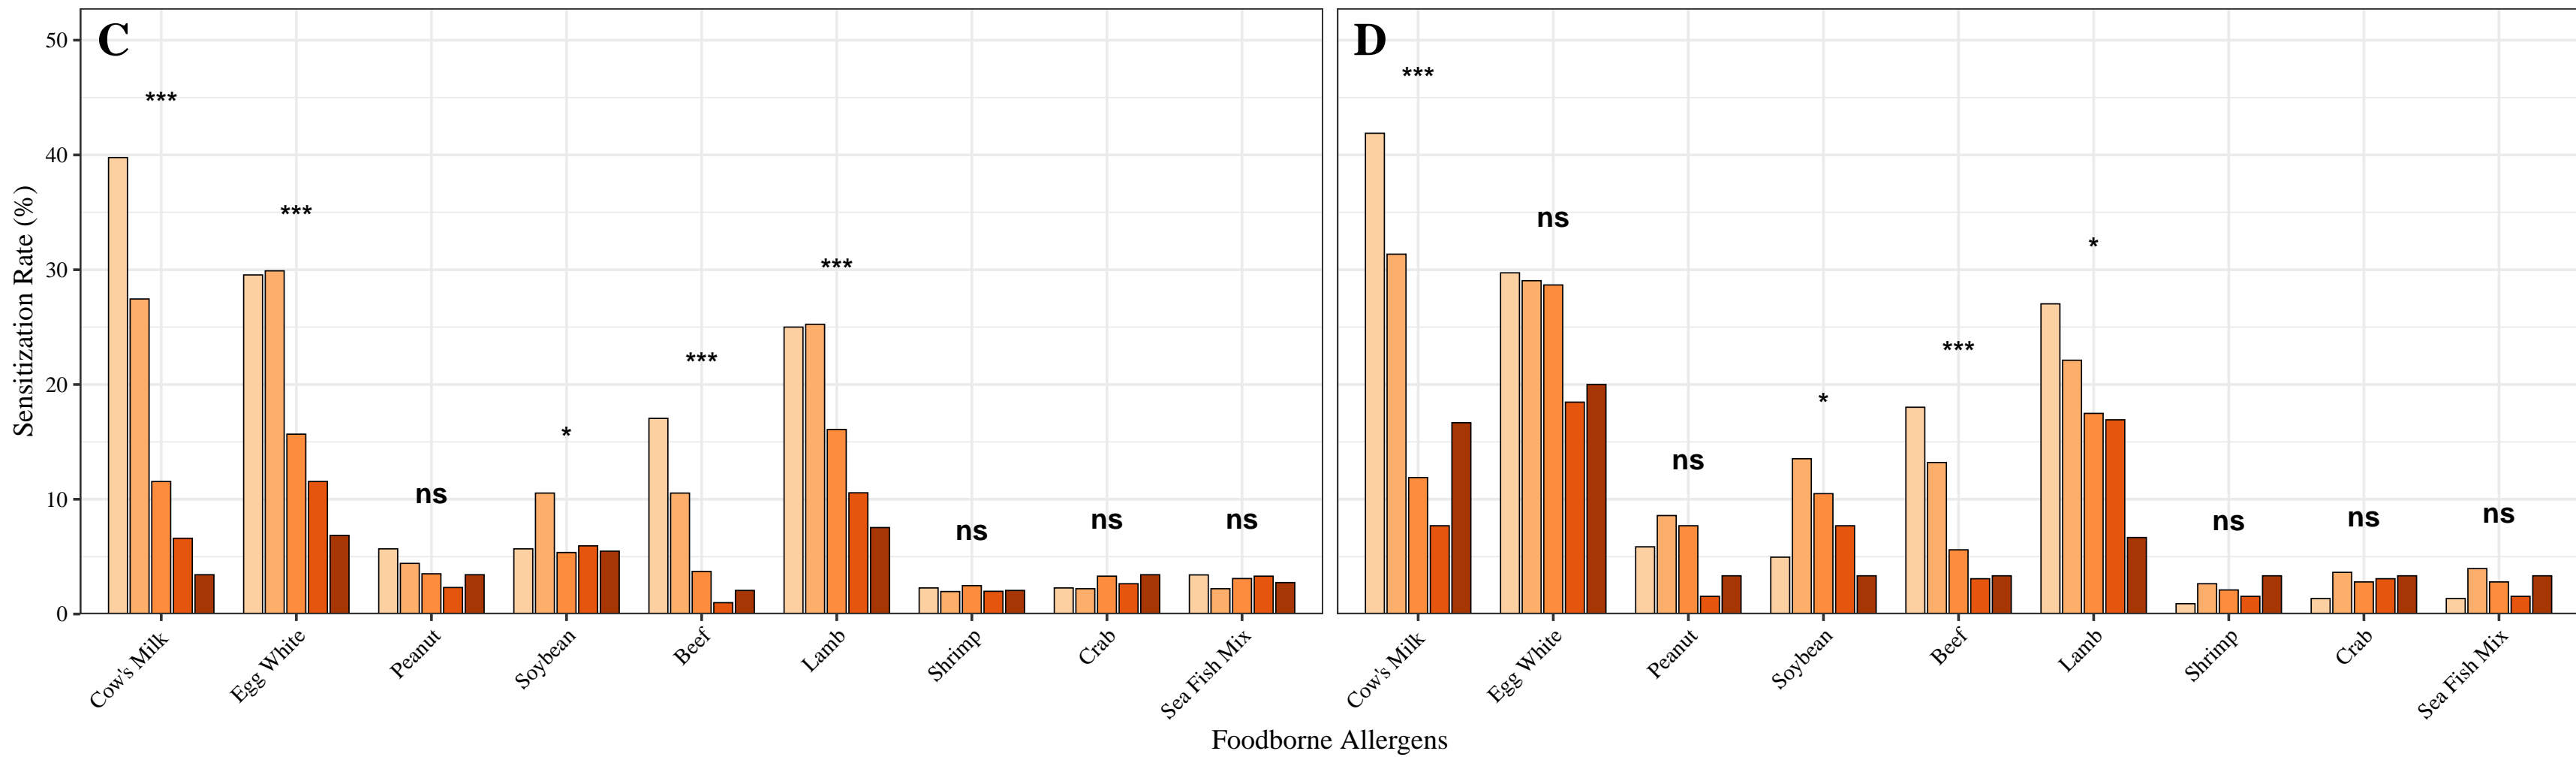

**Figure S2. Comparison of specific IgE (sIgE) titers for individual allergens between the Asthma and Allergic Rhinitis cohorts.**

The subpanels (A-R) correspond to the distribution of specific IgE titers for Mugwort (A), House Dust Mite Mix (B), Dog Dander (C), Humulus scandens (D), Cat Dander (E), Mold Mix (F), Ragweed (G), Tree Pollen Mix (H), Cockroach (I), Sea Fish Mix (J), Peanut (K), Soybean (L), Egg White (M), Cow's Milk (N), Beef (O), Shrimp (P), Crab (Q), and Lamb (R), respectively. Boxplots illustrate the quantitative distribution of sIgE levels among sensitized individuals ( $sIgE \geq 0.35$  IU/mL) across different specific allergens. Statistical differences in sIgE titers between the asthma and allergic rhinitis phenotypes were assessed using the Mann-Whitney U test. *Notes: House Dust Mite Mix includes Dermatophagoides pteronyssinus and Dermatophagoides farinae; Mold Mix includes Penicillium notatum, Alternaria alternata, Aspergillus fumigatus, and Cladosporium herbarum; Tree Pollen Mix includes willow, poplar, and elm; Sea Fish Mix includes cod, lobster, and scallop. ns, not significant; \*  $P < 0.05$ ; \*\*  $P < 0.01$ .*

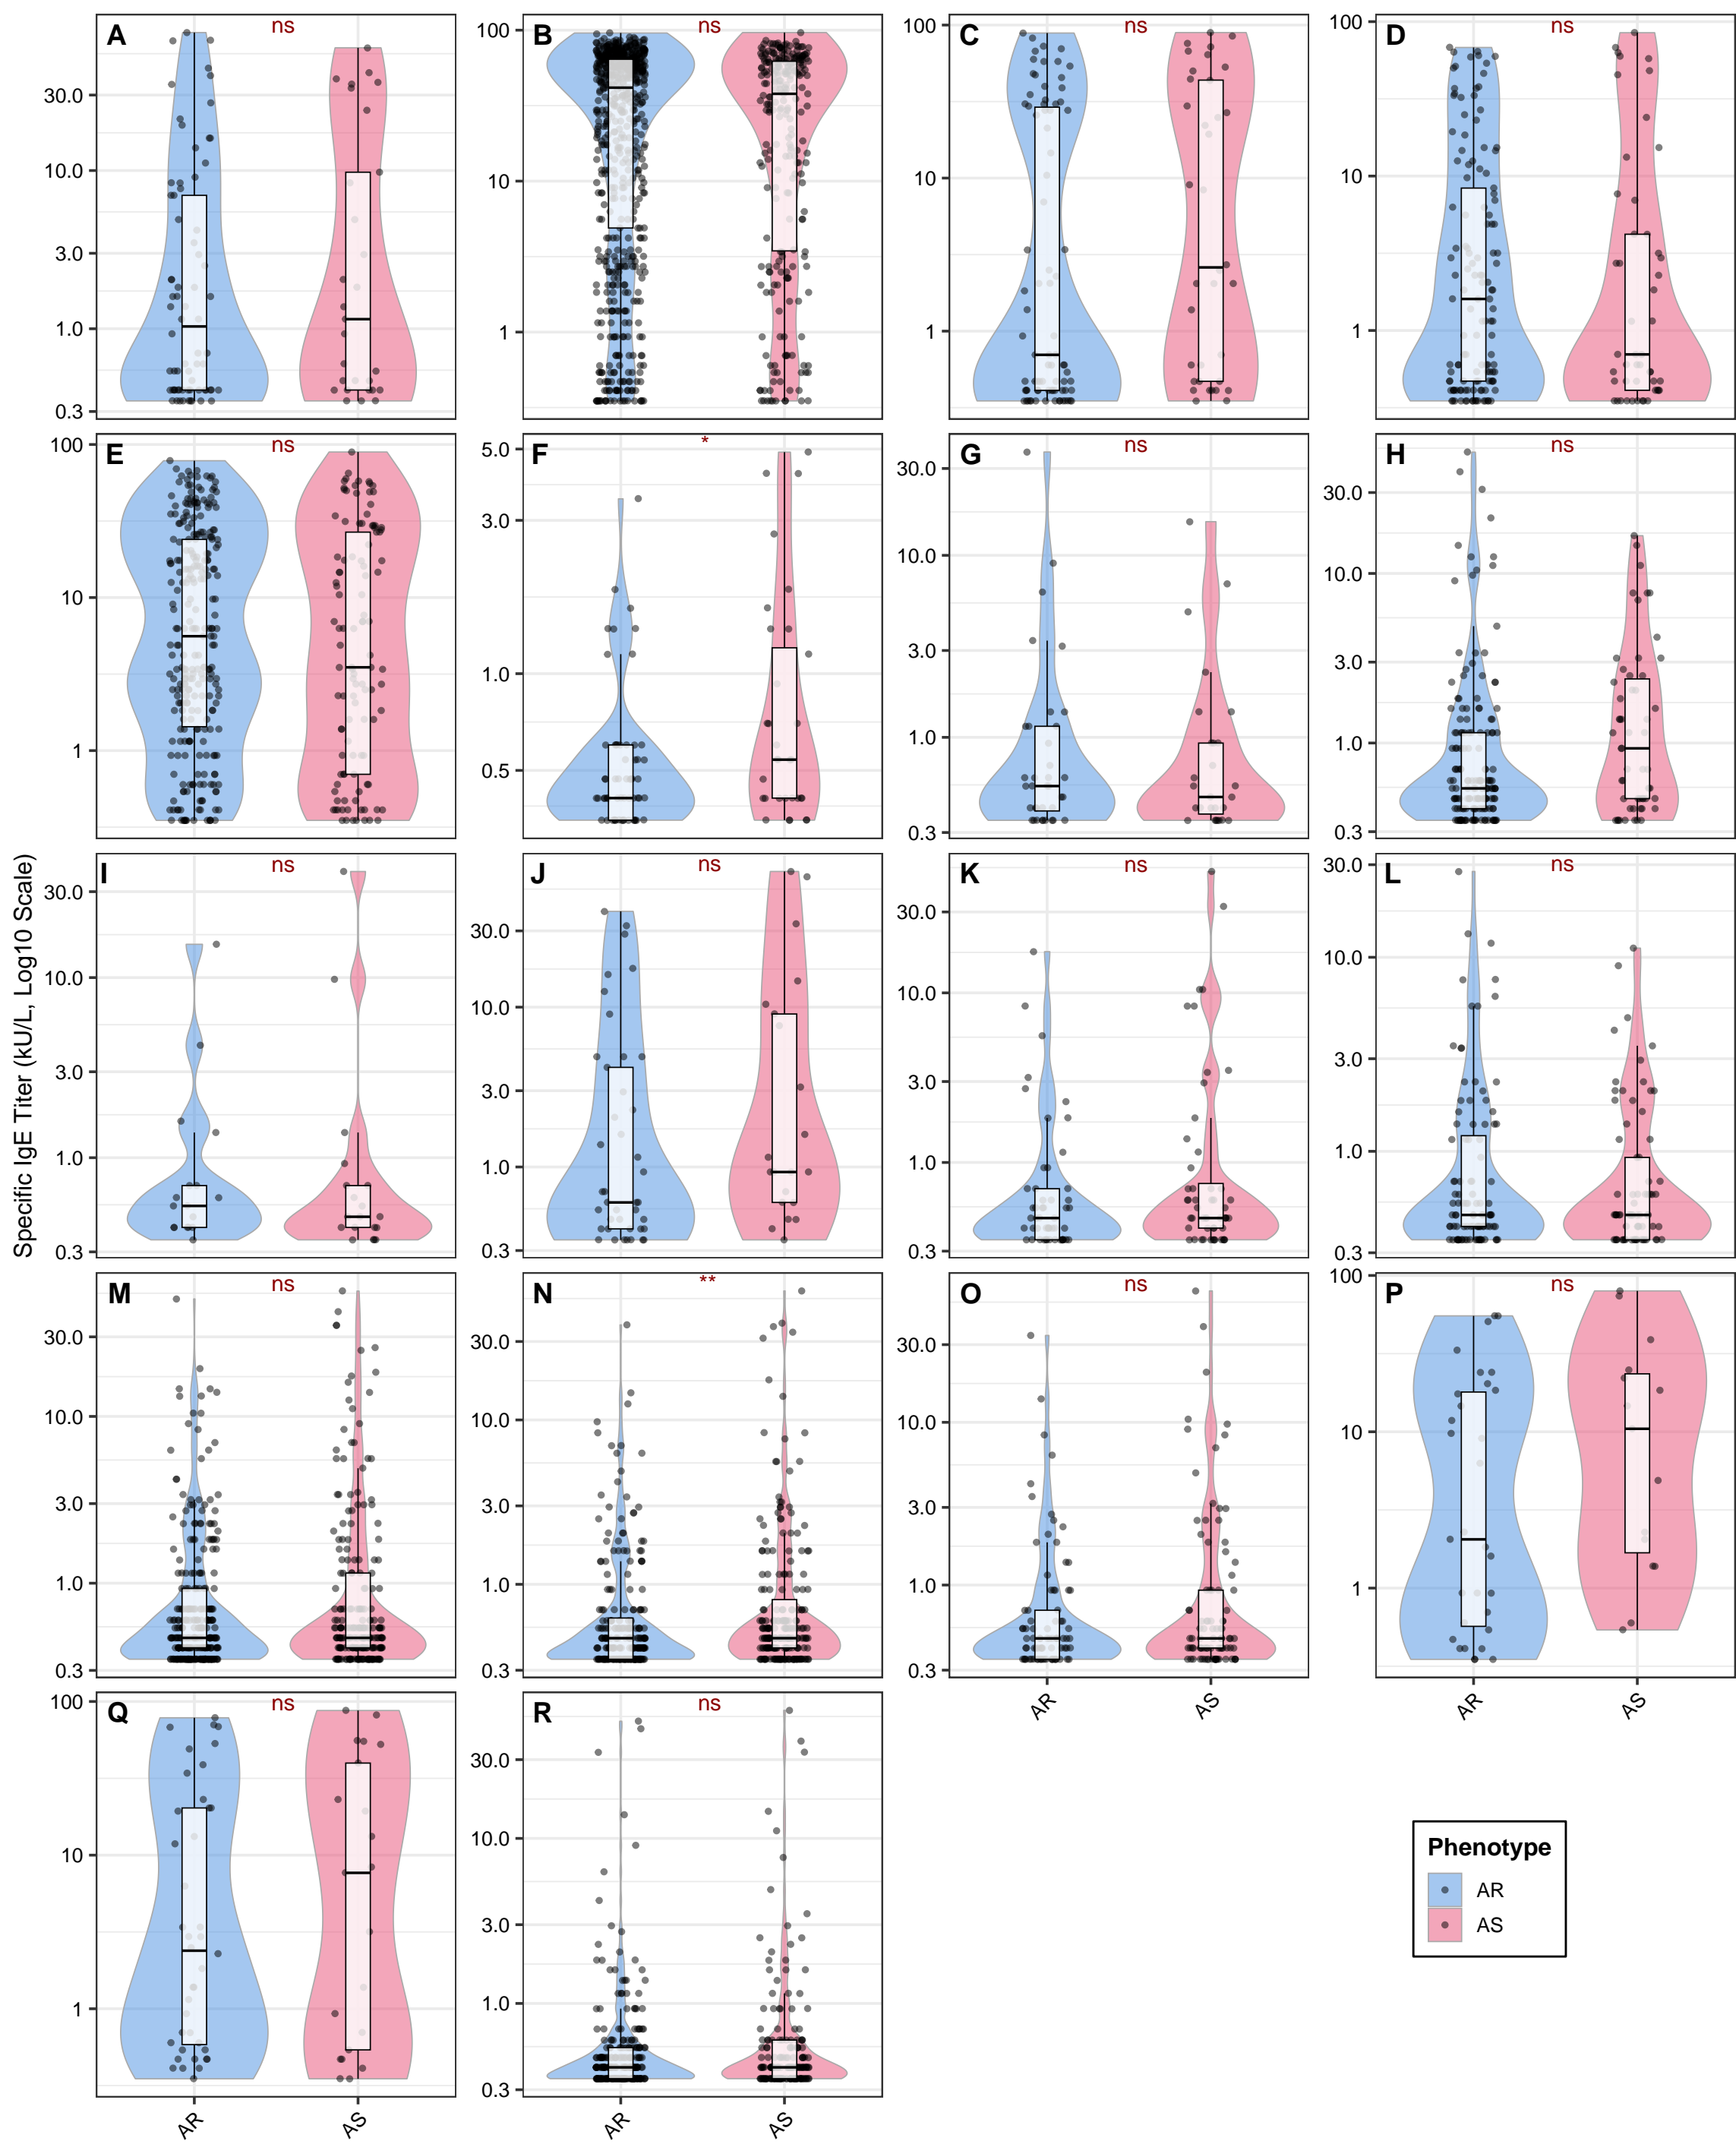

Supplement: Supplementary file 1 [file 620785%20Supplementary%20Material.pdf]
